# Supplementary material for: Long-term exposure to outdoor air pollution and the incidence of chronic obstructive pulmonary disease in a national English cohort
Source: PubMed Central journal article supplement — Occup Environ Med. 2014 Aug 21;72(1):42–8. doi: 10.1136/oemed-2014-102266 (PMC4283678; doi:10.1136/oemed-2014-102266), 2014-08-21
Supplement: oemed-2014-102266-s1.pdf [file oemed-2014-102266-s1.pdf]

## Supplementary Material

### **Long-term exposure to outdoor air pollution and the incidence of chronic obstructive pulmonary disease in a national English cohort**

RW Atkinson<sup>1</sup>, IM Carey<sup>1</sup>, AJ Kent<sup>2</sup>, TP van Staa<sup>3,4</sup>, HR Anderson<sup>1,5</sup>, DG Cook<sup>1</sup>

#### Contents

Methods: The emission inventory, modelling and validation of models for estimating exposure to air pollutants

Table 1 Model validation statistics ( $R^2$ ) at national network and verification sites, 2002-2007

Table 2 Summary statistics for comparison between modelled and measured ozone concentrations (maximum daily 8-hour mean) using number of days exceeding  $120 \mu\text{g m}^{-3}$

Table 3 Two-pollutant models showing hazard ratios summarizing the change in risk of incident COPD in 2003-2007 associated with an interquartile change in each pollutant

Methods: The emission inventory, modelling and validation of models for estimating exposure to air pollutants

## Introduction

Ricardo-AEA is contracted by Department for Environment, Food and Rural Affairs, a government department responsible for policy and regulations on the environment in the UK. Ricardo-AEA have developed and refined dispersion models for reporting to both the UK Government and the European Commission and for policy formulation by the UK Government. The models use the national emission inventories and seeks to model some of the physical and chemical processes in the atmosphere. The model represents dispersion over different terrain types using a variety of dispersion kernels for different land uses. The models provide a national scale output (across the UK) at 1x1km resolution and provide historical back-log of data for multiple pollutants and for multiple years over the last decade. These contribute to the UK Government's officially reported concentrations to the EU which are a combination of modelled concentrations and concentrations from national monitoring networks. These data have a well-established provenance within the UK air pollution community and their validity for use in epidemiology has been previously established<sup>1,2</sup>.

## Emission inventory

Emission estimates provided by the UK National Atmospheric Emission Inventory (NAEI)<sup>3</sup>, provide the basis for the air pollution dispersion models. The Inventory is funded by the Government and provides detailed information on air pollutant emissions from a range of sources including point sources (e.g. industrial sites) and from area sources (e.g. roads, domestic combustion and smaller industrial sites) which are typically derived from a combination of activity statistics (such as fuel consumption) and known emission factors (for example, emission of a given pollutant per tonne of a given fuel burnt or kilometre travelled). Emissions from road traffic on major roads are estimated from a combination of traffic activity data (daily flows for different vehicle types on each of approximately 19,000 major road links), vehicle fleet characteristics (age, relevant emission standard) and emission factors (emissions per km per vehicle). These emission estimates are then aggregated into sectors such as domestic heating, road traffic emissions and industrial emissions. The UK total emission estimates for

each activity are then distributed across 1 km x 1 km squares covering the whole of the UK. The spatial patterns of emissions are derived from proxy information such as population or employment statistics for a number of activities and are fully explained in the most recent UK Emission Mapping Methodology report<sup>4</sup>.

## Air Pollution Modeling

### Oxides of nitrogen

Concentrations of NO<sub>x</sub> and NO<sub>2</sub> were estimated using the Pollution Climate Mapping model<sup>5-7</sup>.

### Modelling NO<sub>x</sub> concentrations

Annual mean NO<sub>x</sub> concentrations were calculated by summing the estimated concentrations for the following components:

- Distant sources (characterised by the rural background concentration, interpolated from measurements at rural sites)
- Point sources (calculated using an air dispersion model)
- Local area sources (calculated using a kernel based air dispersion model)

The area source model has been calibrated using data from the national automatic monitoring networks for the relevant year.

### Modelling NO<sub>2</sub> concentrations

To estimate NO<sub>2</sub> concentrations, modelled NO<sub>x</sub> concentrations derived from the approach outlined above are converted to NO<sub>2</sub> using an oxidant partitioning model which describes the complex inter-relationships of NO, NO<sub>2</sub> and ozone as a set of chemically coupled species<sup>8</sup>. This approach provides additional insights into the factors controlling ambient levels of NO<sub>2</sub> (including the emission of primary NO<sub>2</sub>), and how they may vary with NO<sub>x</sub> concentration.

### Particulate matter

PM<sub>10</sub> and PM<sub>2.5</sub> concentrations were estimated using the Pollution Climate Mapping model<sup>7,9</sup>. Annual mean PM concentrations were calculated by summing the estimated concentrations for the following components:

- Secondary inorganic aerosol (derived by scaling measurements of PM, SO<sub>4</sub>, NO<sub>3</sub>)
- Point sources of primary particles (modelled using an air dispersion model and UK national emissions estimates from the National Atmospheric Emission Inventory).
- Area sources of primary particles (modelled using a dispersion kernel, which is derived using an air dispersion model and emissions estimates from the National Atmospheric Emission Inventory)
- Long-range transport primary particles (modelled with the TRACK model, a Lagrangian statistical model<sup>10</sup>)
- Residual (assumed to be a constant value)

The area source model was calibrated using data from the national automatic monitoring networks for the relevant year.

### Sulphur dioxide

SO<sub>2</sub> concentration estimates were estimated using the Pollution Climate Mapping model<sup>7</sup>. Annual mean SO<sub>2</sub> concentrations were calculated by summing the estimated concentrations for the following components:

- Point sources (calculated using an air dispersion model)
- Local area sources (calculated using a kernel based air dispersion model)

Point sources (such as power stations and refineries) are the dominant contributor to ground level concentrations across most of the UK. A number of major point sources are modelled using emissions information and activity profiles provided directly by power station operators.

### Ozone

The empirical mapping methods used to calculate the maps of annual mean ozone concentration have been described by Stedman and Kent<sup>11</sup> as a further development of the methods presented by Coyle et al<sup>12</sup>.

### Mapping ozone concentrations

The maps of annual mean concentration were calculated by interpolating monitoring data from rural monitoring sites for the well-mixed period in the afternoon (12:00 to 18:00). Two corrections were then applied: to correct for altitude and for the effect of urban environments. The altitude correction was applied to take account of the effects

of topography on ozone levels<sup>12</sup>. Topographic effects are important for some ozone metrics, such as the annual mean, because of the disconnection of a shallow boundary layer from air aloft during the night at lowland locations. Surface ozone concentrations are lower at night in these locations due to a combination of dry deposition and titration with NO emissions. This effect is much less marked at higher altitudes and at coastal locations, where wind is generally stronger and a shallow boundary layer does not form. An urban decrement (the difference between the ozone concentration in an urban area and the regional rural value) was then calculated using the oxidant partitioning model of Jenkin<sup>8</sup>. Maps of regional oxidant were calculated as the sum of altitude corrected ozone and rural NO<sub>2</sub> as interpolated from measurements at rural sites. The partitioning of oxidant between ozone and NO<sub>2</sub> was then calculated as a function of local NO<sub>x</sub> concentrations, as modelled using the approach described above. Maps of annual mean ozone concentration were calculated for all of the 1 km x 1 km squares in the UK by subtracting this urban decrement from the estimates of rural concentrations.

#### Model Calibration

Model calibration is achieved using national network sites applied only to the local (within ~15km) area source emissions (i.e. emissions provided by the NAEI on a 1x1 km grid). Point source emissions are modelled explicitly using a dispersion model (ADMS) which is populated using the NAEI, meteorological data purchased from the UK Met Office and stack parameters gathered from EA permits. The un-calibrated area source emissions are put through a GIS-based dispersion kernel (also generated using ADMS and Met Office data) and then the output at national network monitoring sites is compared with the measured concentrations from those sites. The measured concentrations are amended first by subtracting the modelled point source contribution (and other pollutant specific components such as long range transport primary particulate matter) at each site so that we are comparing like with like (i.e. the modelled area sources are being fairly compared with the area source component of the measured concentrations. This comparison is used to compose the calibration plot from which the calibration factor for the UK is derived. Some sites will be better represented than others because a single calibration factor is being applied to the whole map. The calibration is then applied by scaling up the un-calibrated dispersed (i.e. dispersion kernel applied) NAEI gridded emissions. This calibrated area source grid is then added

to the small and large point source grids and any other pollutant specific grids (e.g. long range transport primary, secondary organic aerosol, secondary inorganic aerosol, sea salt, rural NO<sub>x</sub>) to make the final grid of estimated ambient concentrations.

### Model Validation

Table 1 gives the model validation statistics ( $R^2$ ) for annual concentrations of PM<sub>10</sub>, SO<sub>2</sub> and NO<sub>2</sub> in 2002-2007 at national network and verification sites, as well as the numbers of monitors used in these assessments. Our main analyses were based on using 2002 levels exclusively, an a priori decision made independent of model validation. However we have included extra years here to give a more complete picture of model performance. The  $R^2$  values based upon verification sites (details of the Verification Sites (VS) used in the 'calibration club' are given in Stedman<sup>13</sup>) provide the strongest indication of the performance of the model. The data from the National Network (NN) monitoring sites are used to calibrate the model. However they do provide some indication of model performance since these data are used to provide a single, universal calibration factor (as opposed to adjusting the model to ensure good agreement specifically at the locations for which measured data are available) that is subsequently applied to all 1x1 km grids.

- For PM<sub>10</sub>, while there was general agreement at NN sites and VS over time, model validation overall was only moderate (e.g. in 2002  $R^2 = 0.29$  for NN,  $R^2 = 0.46$  for VS).
- Due to the limited number of monitoring sites measuring PM<sub>2.5</sub> prior to 2009, model validation statistics for PM<sub>2.5</sub> for 2002 was not available. However, the modelling for PM<sub>10</sub> and PM<sub>2.5</sub> is carried out in parallel and the same general methodology is used and many of the same components so model performance for PM<sub>10</sub> and PM<sub>2.5</sub> is similar. In 2009 separate model validation for PM<sub>2.5</sub> was possible and model agreement was very similar to what had been reported previously for PM<sub>10</sub> (e.g.  $R^2 = 0.23-0.71$  for NN)<sup>14</sup>.
- For SO<sub>2</sub>, the  $R^2$  for 2002 were 0.39 at the NN sites, but 0 at the VS, though this was based on only 17 sites. The level of agreement varies substantially from year to

year (from 0.23 to 0.45 at NN sites 0 to 0.6 at the VS sites), and generally improved when calculation were based on more national network and verification sites.

- The  $R^2$  statistics for  $\text{NO}_2$  were good for both the NN ( $>0.80$ ) and VS sites ( $>0.57$ ) and were consistently good year on year.
- Modelled ozone concentrations were verified using number of days exceeding  $120 \mu\text{g}/\text{m}^3$  – the appropriate statistic for policy purposes. The performance of our models – aggregated over 2002-2004 and 2005-2007 are shown in Table 2, demonstrating good model performance at the NN sites ( $R^2>0.7$ ) and moderate performance at the VS ( $R^2=0.24-0.48$ ).

Table 1 Model validation statistics ( $R^2$ ) at national network and verification sites, 2002-2007

| Pollutant        | Network | 2002 | 2003 | 2004 | 2005 | 2006  | 2007              |
|------------------|---------|------|------|------|------|-------|-------------------|
| SO <sub>2</sub>  | NN      | 0.39 | 0.45 | 0.23 | 0.33 | 0.29  | 0.37              |
|                  | # sites | 127  | 108  | 96   | 100  | 98    | 66                |
|                  | VS      | 0.00 | 0.56 | 0.14 | 0.00 | 0.04  | 0.59              |
|                  | # sites | 17   | 43   | 20   | 31   | 27    | 45                |
| NO <sub>2</sub>  | NN      | 0.80 | 0.83 | 0.87 | 0.90 | 0.88  | 0.87              |
|                  | # sites | 62   | 64   | 69   | 62   | 74    | 77                |
|                  | VS      | 0.57 | 0.87 | 0.82 | 0.75 | 0.85  | 0.83              |
|                  | # sites | 24   | 19   | 21   | 33   | 36    | 80                |
| PM <sub>10</sub> | NN      | 0.29 | 0.25 | 0.40 | 0.28 | 0.32* | 0.48 <sup>s</sup> |
|                  | # sites | 46   | 47   | 48   | 50   | 48    | 31                |
|                  | VS      | 0.46 | 0.37 | 0.11 | 0.13 | 0.34  | 0.36              |
|                  | # sites | 27   | 20   | 37   | 39   | 63    | 53                |

Notes: NN - National Network monitoring stations; VS Verification Sites; \*0.62 at 6 gravimetric sites, <sup>s</sup>0.83 at 10 sites  
Sources: Stedman et al (Stedman et al 2003, Stedman et al 2005a, Stedman et al 2005b), Kent et al (Kent et al 2006, Kent et al 2007), Grice et al (Grice et al 2008)

Table 2 Summary statistics for comparisons between the number of days on which modelled and measured daily 8-hour mean ozone exceeded 120  $\mu\text{g}/\text{m}^3$

|                    | Period | Mean of measurements (days) | Mean of model estimates (days) | R <sup>2</sup> | No. sites |
|--------------------|--------|-----------------------------|--------------------------------|----------------|-----------|
| National Network   | 2002-4 | 6.4                         | 6.5                            | 0.71           | 61        |
| Verification Sites | 2002-4 | 10.3                        | 8.5                            | 0.48           | 21        |
| National Network   | 2005-7 | 6.1                         | 6.0                            | 0.76           | 71        |
| Verification Sites | 2005-7 | 8.3                         | 7.2                            | 0.24           | 17        |

Source: Bush et al (Bush et al 2004), Kent et al (Kent et al 2008)



Table 3 Two-pollutant models showing hazard ratios summarizing the change in risk of incident COPD in 2003-2007 associated with an interquartile change in each pollutant

| Adjustment Factors                                                                                             | PM <sub>10</sub> |           | PM <sub>2.5</sub> |           | SO <sub>2</sub> |           | NO <sub>2</sub> |           | O <sub>3</sub> |           |
|----------------------------------------------------------------------------------------------------------------|------------------|-----------|-------------------|-----------|-----------------|-----------|-----------------|-----------|----------------|-----------|
|                                                                                                                | HR               | 95%       | HR                | 95%       | HR              | 95%       | HR              | 95%       | HR             | 95%       |
| Outcome=First COPD recording on GP record in 2003-7, Exclusions=Any COPD recorded on GP record prior to 2003   |                  |           |                   |           |                 |           |                 |           |                |           |
| + IMD                                                                                                          | <b>0.99</b>      | 0.93-1.05 | <b>0.99</b>       | 0.92-1.07 | <b>1.07</b>     | 1.03-1.11 | <b>1.03</b>     | 0.96-1.10 | <b>0.94</b>    | 0.89-1.00 |
| Further adjusted for PM <sub>10</sub>                                                                          | -                | -         | -                 | -         | <b>1.09</b>     | 1.05-1.14 | <b>1.13</b>     | 0.99-1.29 | <b>0.93</b>    | 0.88-0.99 |
| Further adjusted for SO <sub>2</sub>                                                                           | <b>0.94</b>      | 0.88-1.01 | <b>0.93</b>       | 0.85-1.01 | -               | -         | <b>0.99</b>     | 0.92-1.07 | <b>0.97</b>    | 0.91-1.03 |
| Further adjusted for NO <sub>2</sub>                                                                           | <b>0.91</b>      | 0.81-1.01 | <b>0.90</b>       | 0.77-1.04 | <b>1.07</b>     | 1.03-1.12 | -               | -         | <b>0.94</b>    | 0.88-1.00 |
| Further adjusted for O <sub>3</sub>                                                                            | <b>0.97</b>      | 0.91-1.03 | <b>0.97</b>       | 0.89-1.05 | <b>1.06</b>     | 1.01-1.11 | <b>1.00</b>     | 0.93-1.08 | -              | -         |
| Outcome=First COPD recording on HES record in 2003-7, Exclusions= Any COPD recorded on GP record prior to 2003 |                  |           |                   |           |                 |           |                 |           |                |           |
| + IMD                                                                                                          | <b>1.05</b>      | 0.98-1.12 | <b>1.07</b>       | 0.98-1.17 | <b>1.01</b>     | 0.97-1.11 | <b>1.06</b>     | 0.98-1.15 | <b>0.96</b>    | 0.90-1.02 |
| Further adjusted for PM <sub>10</sub>                                                                          | -                | -         | -                 | -         | <b>1.00</b>     | 0.94-1.05 | <b>1.05</b>     | 0.91-1.20 | <b>0.97</b>    | 0.90-1.04 |
| Further adjusted for SO <sub>2</sub>                                                                           | <b>1.05</b>      | 0.98-1.14 | <b>1.08</b>       | 0.98-1.19 | -               | -         | <b>1.06</b>     | 0.97-1.15 | <b>0.95</b>    | 0.89-1.02 |
| Further adjusted for NO <sub>2</sub>                                                                           | <b>1.02</b>      | 0.90-1.14 | <b>1.04</b>       | 0.89-1.21 | <b>1.00</b>     | 0.95-1.05 | -               | -         | <b>0.97</b>    | 0.90-1.04 |
| Further adjusted for O <sub>3</sub>                                                                            | <b>1.03</b>      | 0.96-1.11 | <b>1.05</b>       | 0.96-1.15 | <b>1.00</b>     | 0.95-1.06 | <b>1.04</b>     | 0.95-1.13 | -              | -         |

Notes: Effects are for IQR change in exposure level unless stated (PM<sub>10</sub>=3.0µg/m<sup>3</sup>, PM<sub>2.5</sub>=1.9µg/m<sup>3</sup>, SO<sub>2</sub>=2.2 µg/m<sup>3</sup>, NO<sub>2</sub>=10.7µg/m<sup>3</sup>, O<sub>3</sub>=3.0 µg/m<sup>3</sup>). Practice is accounted for in above models by the sandwich estimator to produce robust standard errors (Cox model). The numbers of patients in the analyses with this additional exclusion were: PM<sub>10</sub>/PM<sub>2.5</sub> n=690,102, SO<sub>2</sub> n=684,261, NO<sub>2</sub> n=689,767, O<sub>3</sub> n=684,261.

## Reference List

1. Forbes LJ, Patel MD, Rudnicka AR, Cook DG, Bush T, Stedman JR, Whincup PH, Strachan DP, Anderson RH. Chronic exposure to outdoor air pollution and markers of systemic inflammation. *Epidemiology*. 2009;20(2):245-253.
2. Forbes LJ, Kapetanakis V, Rudnicka AR, Cook DG, Bush T, Stedman JR, Whincup PH, Strachan DP, Anderson HR. Chronic exposure to outdoor air pollution and lung function in adults. *Thorax*. 2009;64(8):657-663.
3. Dore, C. J., Watterson, J. D., Murrells, T. P., Pasant, N. P, Hobson, M. M, and Baggott, S. L. UK emissions of air pollutants 1970 to 1994. AEAT/ENV/R/2359. 2007. Didcot, Oxfordshire. AEA Technology, National Environmental Technology Centre. [http://uk-air.defra.gov.uk/reports/cat07/0701221151\\_Full\\_Report\\_NAEI\\_2004.pdf](http://uk-air.defra.gov.uk/reports/cat07/0701221151_Full_Report_NAEI_2004.pdf). Accessed 21-3-2013.
4. Bush, T. J., Tsagatakis, I., Passant, N., Griffin, A., and Pearson, B. UK Emission Mapping Methodology 2007. Report AEAT/ENV/R/2863. 2010. Didcot, Oxfordshire. AEA Technology, National Environmental Technology Centre. [http://uk-air.defra.gov.uk/reports/cat07/1207031139\\_UKMappingMethodReport2007.pdf](http://uk-air.defra.gov.uk/reports/cat07/1207031139_UKMappingMethodReport2007.pdf). Accessed 26-3-2012.
5. Stedman JR, Vincent KJ, Campbell GW, Goodwin JW, Downing CE. New high resolution maps of estimated background ambient NO<sub>x</sub> and NO<sub>2</sub> concentrations in the U.K. *Atmospheric Environment*. 1997;31:3591-3602.
6. Stedman JR, Goodwin JW, King K, Murrells TP, Bush TJ. An empirical model for predicting urban roadside nitrogen dioxide concentrations in the UK. *Atmospheric Environment*. 2001;35(8):1451-1463.
7. Stedman, J. R., Bush, T. J., Vincent, K. J., and Baggott, S. UK air quality modelling for annual reporting 2002 on ambient air quality assessment under Council Directives 96/62/EC, 1999/30/EC and 2000/69/EC. Report AEAT/ENV/R/1564. 2003. Didcot, Oxfordshire.

- AEA Energy & Environment. [http://uk-air.defra.gov.uk/reports/cat05/0402061100\\_dd12002mapsrep1-2.pdf](http://uk-air.defra.gov.uk/reports/cat05/0402061100_dd12002mapsrep1-2.pdf). Accessed 14-1-2013.
8. Jenkin ME. Analysis of sources and partitioning of oxidant in the UK--Part 1: the NO<sub>x</sub>-dependence of annual mean concentrations of nitrogen dioxide and ozone. *Atmospheric Environment*. 2004;38:5117-5129.
  9. Stedman JR, Kent AJ, Grice S, Bush TJ, Derwent RG. A consistent method for modelling PM<sub>10</sub> and PM<sub>2.5</sub> concentrations across the United Kingdom in 2004 for air quality assessment. *Atmospheric Environment*. 2007;41:161-172.
  10. Lee DS, Kingdon RD, Jenkin ME, Garland JA. Modelling the atmospheric oxidised and reduced nitrogen budgets for the UK with a Lagrangian multi-layer long-range transport model. *Environmental Modelling and Assessment*. 2000;5:83-104.
  11. Stedman JR, Kent AJ. An analysis of the spatial patterns of health related surface ozone metrics across the UK in 1995, 2003 and 2005. *Atmospheric Environment*. 2008;42:1702-1716.
  12. Coyle M, Smith RI, Stedman JR, Weston KJ, Fowler D. Quantifying the spatial distribution of surface ozone concentration in the UK. *Atmospheric Environment*. 2002;36:1013-1024.
  13. Stedman, J. R. and Handley, C. A comparison of national maps of NO<sub>2</sub> and PM<sub>10</sub> concentrations with data from the NETCEN 'Calibration Club.' Report AEAT/ENV/R/0725. 2001. Didcot, Oxfordshire. AEA Technology. <http://uk-air.defra.gov.uk/reports/empire/aeat-env-r-0725.pdf>. Accessed 21-1-2013.
  14. Grice, S., Brookes, D. M., Stedman, J. R., Kent, A. J., Walker, L. J., Cooke, S. L., Vincent, K. J., Lingard, J. N., Bush, T. J., Abbott, J., and Yap, F. W. UK air quality modelling under the Air Quality Directive (2008/50/EC) for 2009 covering the following pollutants: SO<sub>2</sub>, NO<sub>x</sub>, NO<sub>2</sub>, PM<sub>10</sub>, PM<sub>2.5</sub>, lead, benzene, CO and ozone. Report AEAT/ENV/R/3069. 2010. Didcot, Oxfordshire. AEA Technology, National Environmental Technology Centre.

- [http://www.hpa.org.uk/webc/HPAwebFile/HPAweb\\_C/1317137020526](http://www.hpa.org.uk/webc/HPAwebFile/HPAweb_C/1317137020526). Accessed 18-2-2013.
15. Stedman, J. R., Bush, T. J., Vincent, K. J., Kent, A. J., Grice, S., and Abbott, J. UK air quality modelling for annual reporting 2003 on ambient air quality assessment under Council Directives 96/62/EC, 1999/30/EC and 2000/69/EC. Report AEAT/ENV/R/1790. 2005. Didcot, Oxfordshire. AEA Technology, National Environmental Technology Centre. [http://uk-air.defra.gov.uk/reports/cat05/0501121424\\_dd12003mapsrep4.pdf](http://uk-air.defra.gov.uk/reports/cat05/0501121424_dd12003mapsrep4.pdf). Accessed 21-1-2013.
  16. Stedman, J. R., Bush, T. J., Grice, S., Kent, A. J., Vincent, K. J., Abbott, J., and Derwent, D. UK air quality modelling for annual reporting 2004 on ambient air quality assessment under Council Directives 96/62/EC, 1999/30/EC and 2000/69/EC. Report AEAT/ENV/R/2052. 2005. Didcot, Oxfordshire. AEA Technology, National Environmental Technology Centre. [http://uk-air.defra.gov.uk/reports/cat09/0610161501-416\\_dd12004mapsrep\\_v1e.pdf](http://uk-air.defra.gov.uk/reports/cat09/0610161501-416_dd12004mapsrep_v1e.pdf). Accessed 21-1-2013.
  17. Kent, A. J., Grice, S., Stedman, J. R., Bush, T. J., Vincent, K. J., Abbott, J., and Hobson, M. UK air quality modelling for annual reporting 2005 on ambient air quality assessment under Council Directives 96/62/EC, 1999/30/EC and 2000/69/EC. 2006. AEA Energy & Environment. [http://uk-air.defra.gov.uk/reports/cat09/0709241126\\_dd12005mapsrep\\_v2.pdf](http://uk-air.defra.gov.uk/reports/cat09/0709241126_dd12005mapsrep_v2.pdf). Accessed 21-1-2013.
  18. Kent, A. J., Grice, S., Cooke, S., Stedman, J. R., Bush, T. J., Vincent, K. J., and Abbott, J. UK air quality modelling for annual reporting 2006 on ambient air quality assessment under Council Directives 96/62/EC, 1999/30/EC and 2000/69/EC. Report AEAT/ENV/R/25028. 2007. Didcot, Oxfordshire. AEA Technology, National Environmental Technology Centre. [http://uk-air.defra.gov.uk/reports/cat09/0807231621\\_dd12006mapsrep\\_v2.pdf](http://uk-air.defra.gov.uk/reports/cat09/0807231621_dd12006mapsrep_v2.pdf). Accessed 21-1-2013.
  19. Grice, S., Cooke, S. L., Stedman, J. R., Bush, T. J., Vincent, K. J., Hann, M., Abbott, J., and Kent, A. J. UK air quality modelling for annual reporting 2007 on ambient air quality assessment under Council Directives 96/62/EC, 1999/30/EC and 2000/69/EC. Report AEAT/ENV/R/2656. 2008. Didcot, Oxfordshire. AEA Technology, National Environmental

- Technology Centre. [http://uk-air.defra.gov.uk/reports/cat09/0905061048\\_dd12007mapsrep\\_v8.pdf](http://uk-air.defra.gov.uk/reports/cat09/0905061048_dd12007mapsrep_v8.pdf). Accessed 21-1-2013.
20. Bush, T. J., Targa, J., and Stedman, J. R. UK air quality modelling for annual reporting 2004 on ambient air quality assessment under Council Directives 96/62/EC and 2002/3/EC relating to ozone in ambient air. Report AEAT/ENV/R/2053. 2004. Didcot, Oxfordshire. AEA Energy & Environment. [http://uk-air.defra.gov.uk/reports/cat09/0602281040\\_DD3\\_mapsrep2004v1.doc](http://uk-air.defra.gov.uk/reports/cat09/0602281040_DD3_mapsrep2004v1.doc). Accessed 21-1-2013.
  21. Kent, A. J. and Stedman, J. R. UK air quality modelling for annual reporting 2007 on ambient air quality assessment under Council Directives 96/62/EC and 2002/3/EC relating to ozone in ambient air. Report AEAT/ENV/R/2681. 2008. Didcot, Oxfordshire. AEA Technology, National Environmental Technology Centre. [http://uk-air.defra.gov.uk/reports/cat09/0905061015\\_DD3\\_mapsrep2007\\_v1.pdf](http://uk-air.defra.gov.uk/reports/cat09/0905061015_DD3_mapsrep2007_v1.pdf). Accessed 26-3-2012.
